# Supplementary material for: MicroRNAs Associated with Disability Progression and Clinical Activity in Multiple Sclerosis Patients Treated with Glatiramer Acetate
Source: MDPI journal article supplement (doi:10.3390/biomedicines11102760), 2023-10-12
Supplement: s1 [file s1]

**Table S1.** Correlations between miRNAs and relapse/MRI activity, CDP, and NEDA-3 at 2 and 5 years (U Mann-Whitney).

| miRNA   | EDSS 2 years             |        |        |
|---------|--------------------------|--------|--------|
|         | Relapse/MRI activity (p) | CDP    | NEDA-3 |
| 9.5p    | 0.885                    | 0.584  | 0.673  |
| 126.3p  | 0.128                    | *0.05  | 0.924  |
| 138.5p  | 0.059                    | 0.223  | *0.033 |
| 146a.5p | 0.303                    | *0.044 | 0.634  |
| 200c.3p | 0.823                    | 0.655  | 0.883  |
| 223.3p  | 0.37                     | 0.368  | 0.24   |

  

| miRNA   | EDSS 5 years         |       |        |
|---------|----------------------|-------|--------|
|         | Relapse/MRI activity | CDP   | NEDA-3 |
| 9.5p    | 0.355                | 0.926 | 0.491  |
| 126.3p  | 0.357                | 0.428 | 0.828  |
| 138.5p  | 0.425                | 0.275 | 0.257  |
| 146a.5p | 0.759                | 0.141 | 0.306  |
| 200c.3p | 0.916                | 0.903 | 0.99   |
| 223.3p  | 0.598                | 0.484 | 0.804  |

EDSS: Expanded Disability Status Scale. CDP: Confirmed Disability Progression. NEDA-3: No Evidence of Disease Activity. \* statistically significant *p* value.
